# Supplementary material
Source: publisher figshare collection journal article supplement (https://frontiersin.figshare.com/ndownloader/files/30891634)
Supplement: Supplementary file [file 30891634]

**Tab. 1: Diagnostic procedures of AE-IPF**

|                                                                                                                              | Specialised ILDCentre | Non-ILDspecialisedcentre | Total       | pvalue |
|------------------------------------------------------------------------------------------------------------------------------|-----------------------|--------------------------|-------------|--------|
| D-Dimer                                                                                                                      | 65% (N=315)           | 65% (N=129)              | 65% (N=444) | 1.0000 |
| Troponins                                                                                                                    | 52% (N=315)           | 47% (N=129)              | 50% (N=444) | 0.3697 |
| NT-proBNP/BNP                                                                                                                | 73% (N=315)           | 72% (N=129)              | 73% (N=444) | 0.8812 |
| KL-6                                                                                                                         | 15% (N=315)           | 24% (N=129)              | 18% (N=444) | 0.0313 |
| HRCT / multislice thin-section CT (without contrast media)                                                                   | 76% (N=313)           | 78% (N=128)              | 77% (N=441) | 0.7293 |
| CT with contrast media (even in the absence of clinical suspicion of pulmonary embolism)                                     | 37% (N=313)           | 29% (N=128)              | 34% (N=441) | 0.1440 |
| Echocardiography                                                                                                             | 67% (N=313)           | 67% (N=128)              | 67% (N=441) | 1.0000 |
| Bronchoalveolar lavage always                                                                                                | 4% (N=313)            | 9% (N=128)               | 5% (N=441)  | 0.1022 |
| Bronchoalveolar lavage only if infection is suspected and the patient is in an appropriate condition to undergo bronchoscopy | 73% (N=313)           | 68% (N=128)              | 72% (N=441) | 0.2927 |
| Sputum                                                                                                                       | 86% (N=313)           | 81% (N=128)              | 85% (N=441) | 0.2361 |
| Induced sputum                                                                                                               | 12% (N=313)           | 22% (N=128)              | 15% (N=441) | 0.0106 |
| Urine                                                                                                                        | 42% (N=313)           | 28% (N=128)              | 38% (N=441) | 0.0068 |
| CMV-PCR/CMV pp65Ag                                                                                                           | 39% (N=313)           | 39% (N=127)              | 39% (N=440) | 1.0000 |
| Pneumocystis jiroveci                                                                                                        | 61% (N=313)           | 55% (N=127)              | 59% (N=440) | 0.3307 |
| Influenza                                                                                                                    | 77% (N=313)           | 73% (N=127)              | 76% (N=440) | 0.5212 |
| RSV                                                                                                                          | 50% (N=313)           | 33% (N=127)              | 45% (N=440) | 0.0024 |

**Tab. 2: Treatments of AE-IPF**

|                                                                                                                       | Specialised ILD<br>centre | Non-ILD<br>specialised<br>centre | Total       | pvalue |
|-----------------------------------------------------------------------------------------------------------------------|---------------------------|----------------------------------|-------------|--------|
| Prednisolone 1 mg / kg /<br>day, followed by slow<br>tapering (over weeks)                                            | 30% (N=311)               | 35% (N=127)                      | 32% (N=438) | 0.3092 |
| Methylprednisolone or<br>equivalent 500 mg-1000<br>mg / day for 3 days,<br>followed by slow tapering                  | 63% (N=311)               | 66% (N=127)                      | 64% (N=438) | 0.5687 |
| Methylprednisolone or<br>equivalent 500 mg-1000<br>mg / day pulsed for 3 days<br>WITHOUT any tapering                 | 11% (N=311)               | 12% (N=127)                      | 11% (N=438) | 0.8444 |
| Other prednisolone<br>dosages                                                                                         | 13% (N=311)               | 11% (N=127)                      | 13% (N=438) | 0.6455 |
| Cyclosporine                                                                                                          | 6% (N=311)                | 13% (N=127)                      | 8% (N=438)  | 0.0288 |
| Cyclophosphamide i.v.<br>bolus                                                                                        | 19% (N=311)               | 17% (N=127)                      | 18% (N=438) | 0.6438 |
| Tacrolimus                                                                                                            | 4% (N=311)                | 9% (N=127)                       | 5% (N=438)  | 0.0705 |
| Rituximab                                                                                                             | 4% (N=311)                | 3% (N=127)                       | 4% (N=438)  | 0.8150 |
| No use of any<br>immunosuppressive<br>therapy                                                                         | 4% (N=311)                | 2% (N=127)                       | 3% (N=438)  | 0.4309 |
| Polymyxin B<br>Hemoperfusion (or similar)                                                                             | 7% (N=307)                | 10% (N=126)                      | 8% (N=433)  | 0.5275 |
| Recombinant<br>Thrombomodulin                                                                                         | 8% (N=307)                | 15% (N=126)                      | 10% (N=433) | 0.0342 |
| Plasmapheresis / plasma<br>exchange                                                                                   | 4% (N=307)                | 5% (N=126)                       | 4% (N=433)  | 0.8895 |
| Broad-spectrum antibiotics<br>combined with macrolides                                                                | 56% (N=306)               | 58% (N=126)                      | 56% (N=432) | 0.7288 |
| Antibiotic treatment only<br>when there is a clinical<br>and/or laboratory<br>indication for a bacterial<br>infection | 21% (N=306)               | 25% (N=126)                      | 22% (N=432) | 0.3325 |
| Always initiate or increase<br>antacid drug therapy                                                                   | 17%(N=300)                | 22% (N=121)                      | 19% (N=421) | 0.2579 |

**Tab. 3: Approach to antifibrotic treatment in AE-IPF**

|                                                                         | Specialised ILD<br>centre | Non-ILD<br>specialised<br>centre | Total       | pvalue |
|-------------------------------------------------------------------------|---------------------------|----------------------------------|-------------|--------|
| <i>In pre-diagnosed IPF without antifibrotic treatment</i>              |                           |                                  |             |        |
| Antifibrotic treatment preferentially with Nintedanib                   | 20% (N=303)               | 22% (N=124)                      | 21% (N=427) | 0.8636 |
| Antifibrotic treatment preferentially with Pirfenidone                  | 11% (N=303)               | 19% (N=124)                      | 13% (N=427) | 0.0488 |
| Antifibrotic treatment without preference                               | 35% (N=303)               | 28% (N=124)                      | 33% (N=427) | 0.2417 |
| No antifibrotic treatment                                               | 34% (N=303)               | 31% (N=124)                      | 33% (N=427) | 0.6944 |
| <i>When to start</i>                                                    |                           |                                  |             |        |
| Immediately (Nintedanib)                                                | 43% (N=63)                | 11% (N=27)                       | 33% (N=90)  | 0.0073 |
| Only after stabilization of the patient (Nintedanib)                    | 57% (N=63)                | 89% (N=27)                       | 67% (N=90)  | 0.0073 |
| Immediately (Pirfenidone)                                               | 48% (N=33)                | 30% (N=23)                       | 41% (N=56)  | 0.2825 |
| Only after stabilization of the patient (Pirfenidone)                   | 52% (N=33)                | 70% (N=23)                       | 59% (N=56)  | 0.2825 |
| Immediately (either antifibrotic treatment)                             | 25% (N=106)               | 36% (N=36)                       | 27% (N=142) | 0.2588 |
| Only after stabilization of the patient (either antifibrotic treatment) | 75% (N=106)               | 64% (N=36)                       | 73% (N=142) | 0.2588 |
| <i>Preexisting antifibrotic treatment</i>                               |                           |                                  |             |        |
| Continue unchanged                                                      | 80% (N=300)               | 70% (N=121)                      | 77% (N=421) | 0.0513 |
| Discontinued                                                            | 5% (N=300)                | 7% (N=121)                       | 6% (N=421)  | 0.5491 |
| Continue at reduced dose                                                | 1% (N=300)                | 5% (N=121)                       | 2% (N=421)  | 0.0301 |
| Change to alternative antifibrotic drug                                 | 9% (N=300)                | 10% (N=121)                      | 10% (N=421) | 0.9990 |

**Tab. 4: Approach to PH in AE-IPF**

|                                                                                            | Specialised ILD centre | Non-ILD specialised centre | Total       | pvalue |
|--------------------------------------------------------------------------------------------|------------------------|----------------------------|-------------|--------|
| Start diuretic therapy                                                                     | 54% (N=300)            | 41% (N=121)                | 51% (N=421) | 0.0210 |
| Perform a right heart catheterization                                                      | 6% (N=300)             | 7% (N=121)                 | 7% (N=421)  | 0.8449 |
| Start PH specific treatment after established PH diagnosis                                 | 7% (N=300)             | 14% (N=121)                | 9% (N=421)  | 0.0494 |
| Start PH specific treatment without a confident diagnosis                                  | 3% (N=300)             | 1% (N=121)                 | 2% (N=421)  | 0.4185 |
| Evaluate again after stabilization and possibly perform a right heart catheterization then | 56% (N=300)            | 55% (N=121)                | 55% (N=421) | 0.9195 |
| No PH treatment during or after AE-IPF                                                     | 25% (N=300)            | 25% (N=121)                | 25% (N=421) | 1.0000 |

**Tab. 5: ICU and palliative care in AE-IPF**

|                                                                                                                                  | Specialised ILD centre | Non-ILD specialised centre | Total       | pvalue |
|----------------------------------------------------------------------------------------------------------------------------------|------------------------|----------------------------|-------------|--------|
| Invasive Ventilation for all IPF patients                                                                                        | 9% (N=300)             | 11% (N=121)                | 10% (N=421) | 0.7948 |
| Invasive ventilation only to patients suitable for lung transplantation (LTX) as a bridge to LTX or very selected other patients | 48% (N=300)            | 39% (N=121)                | 45% (N=421) | 0.1240 |
| ECMO only to patients suitable for LTX as a bridge to LTX                                                                        | 49% (N=300)            | 36% (N=121)                | 45% (N=421) | 0.0287 |
| High-flow oxygen                                                                                                                 | 84% (N=300)            | 78% (N=121)                | 82% (N=421) | 0.1641 |
| Non-invasive ventilation                                                                                                         | 72% (N=300)            | 77% (N=121)                | 73% (N=421) | 0.3685 |
| Palliative care always/ usually considered                                                                                       | 65% (N=299)            | 62% (N=121)                | 64% (N=420) | 0.6073 |

**Tab. 6: Prevention of AE-IPF**

|                                                                                                              | Specialised ILD<br>centre | Non-ILD<br>specialised<br>centre | Total       | pvalue |
|--------------------------------------------------------------------------------------------------------------|---------------------------|----------------------------------|-------------|--------|
| If surgery is necessary, use of low tidal volume and avoidance of hyper-oxygenation to try to prevent injury | 72% (N=297)               | 61% (N=119)                      | 69% (N=416) | 0.0368 |
| Preferentially use regional anesthesia (over general) when possible                                          | 70% (N=297)               | 68% (N=119)                      | 69% (N=416) | 0.7827 |
| Any elective surgical procedures should be avoided and only be performed in case of an emergency             | 15% (N=297)               | 18% (N=119)                      | 16% (N=416) | 0.4365 |
| Antifibrotic therapy                                                                                         | 87% (N=295)               | 83% (N=119)                      | 86% (N=414) | 0.3261 |
| Vaccination (influenza, pneumococcal, etc.)                                                                  | 94% (N=295)               | 90% (N=119)                      | 93% (N=414) | 0.2282 |
| Antacids medication (PPI, H2 blockers) in all IPF patients                                                   | 50% (N=295)               | 61% (N=119)                      | 53% (N=414) | 0.0438 |
| Low dose steroids (<10mg) in all IPF patients                                                                | 3% (N=295)                | 7% (N=119)                       | 4% (N=414)  | 0.1022 |
| Anticoagulants in all IPF patients                                                                           | 2% (N=295)                | 2% (N=119)                       | 2% (N=414)  | 1.0000 |
| Azithromycine long term / maintenance                                                                        | 6% (N=295)                | 9% (N=119)                       | 7% (N=414)  | 0.2890 |
| Pulmonary rehabilitation or other forms of structured exercise therapy                                       | 56% (N=295)               | 59% (N=119)                      | 57% (N=414) | 0.6688 |
